# Supplementary material
Source: Springer Nature journal article supplement (https://www.springermedizin.de/resource/supplementary/12958_2011_963_MOESM2_ESM.pdf/9566472)

**A**

Syncytiotrophoblast

Cytotrophoblast

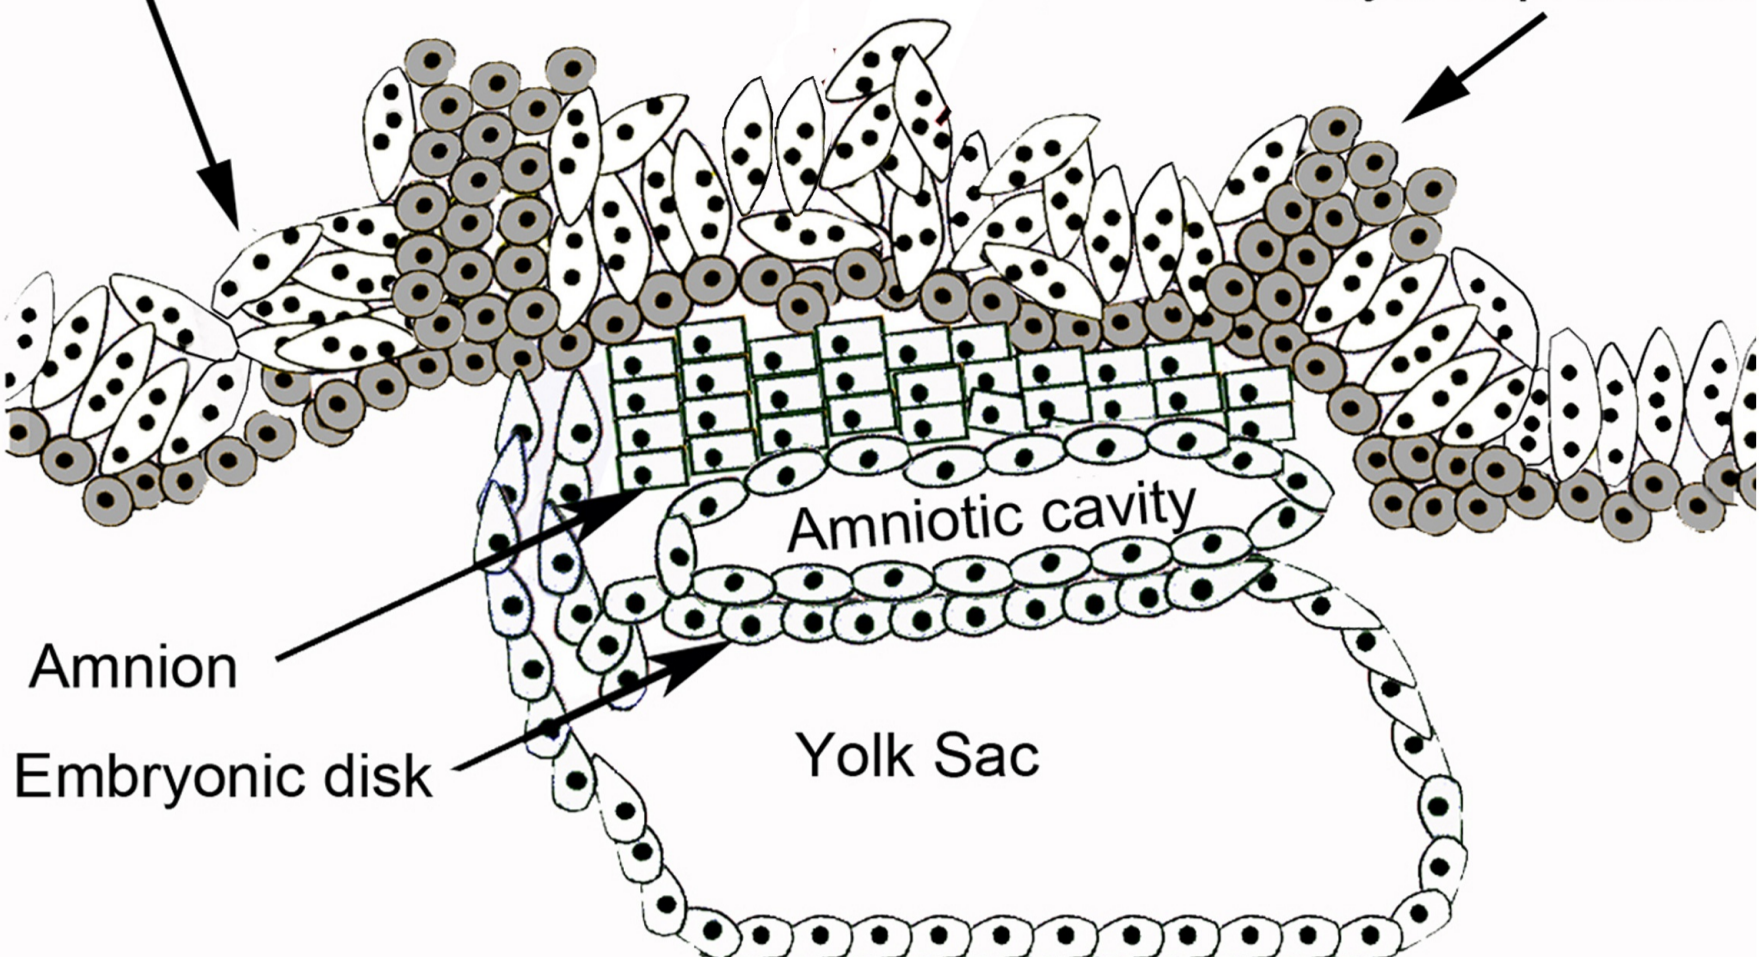**B**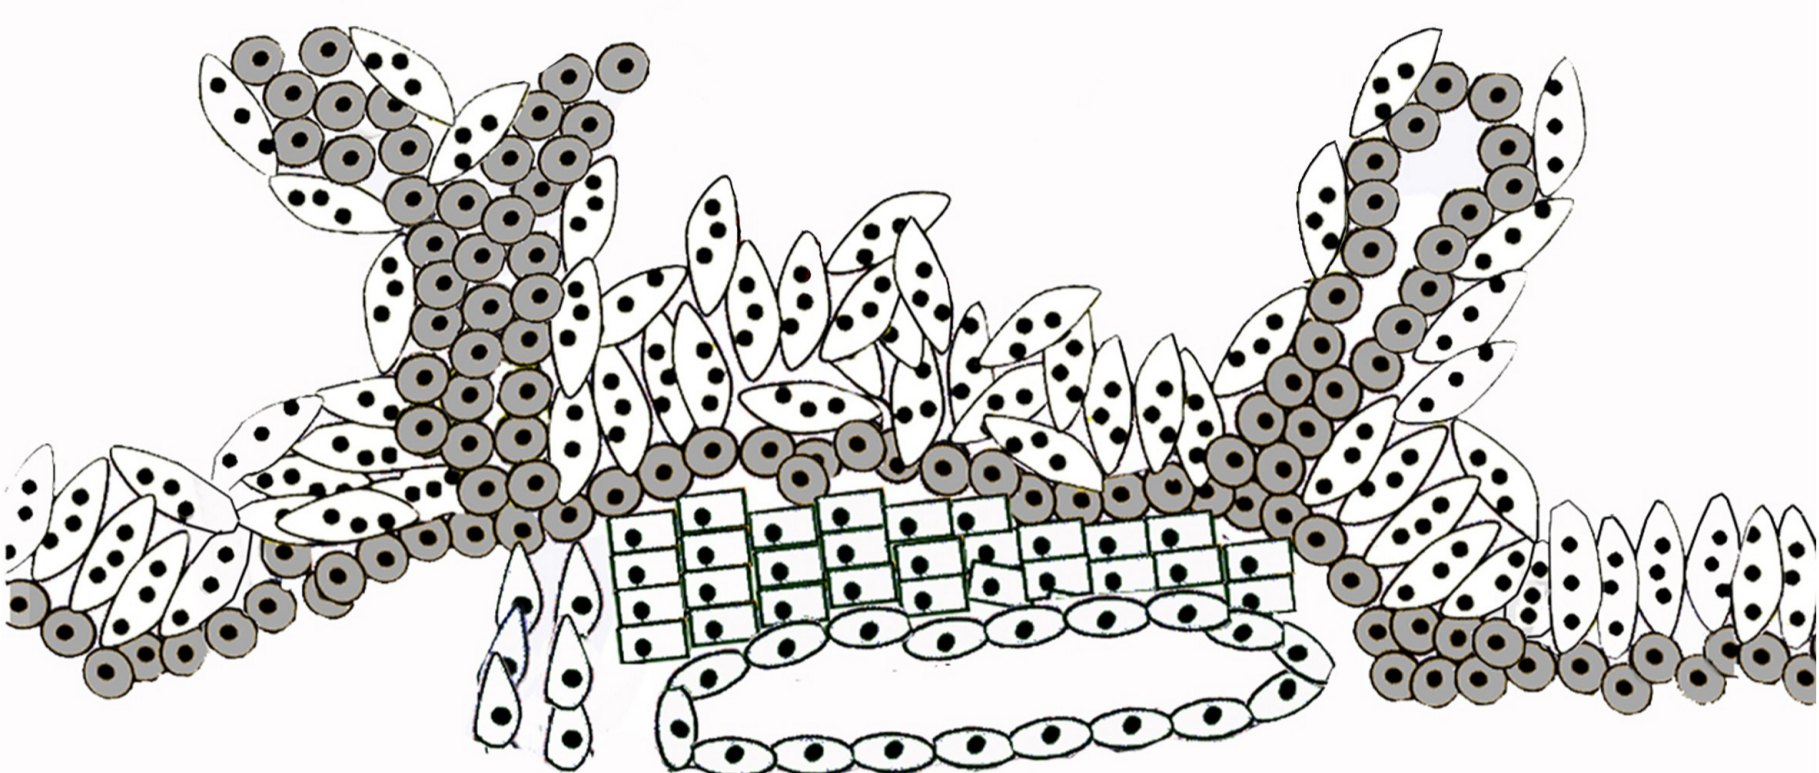**C**

Syncytiotrophoblast

Cytotrophoblast

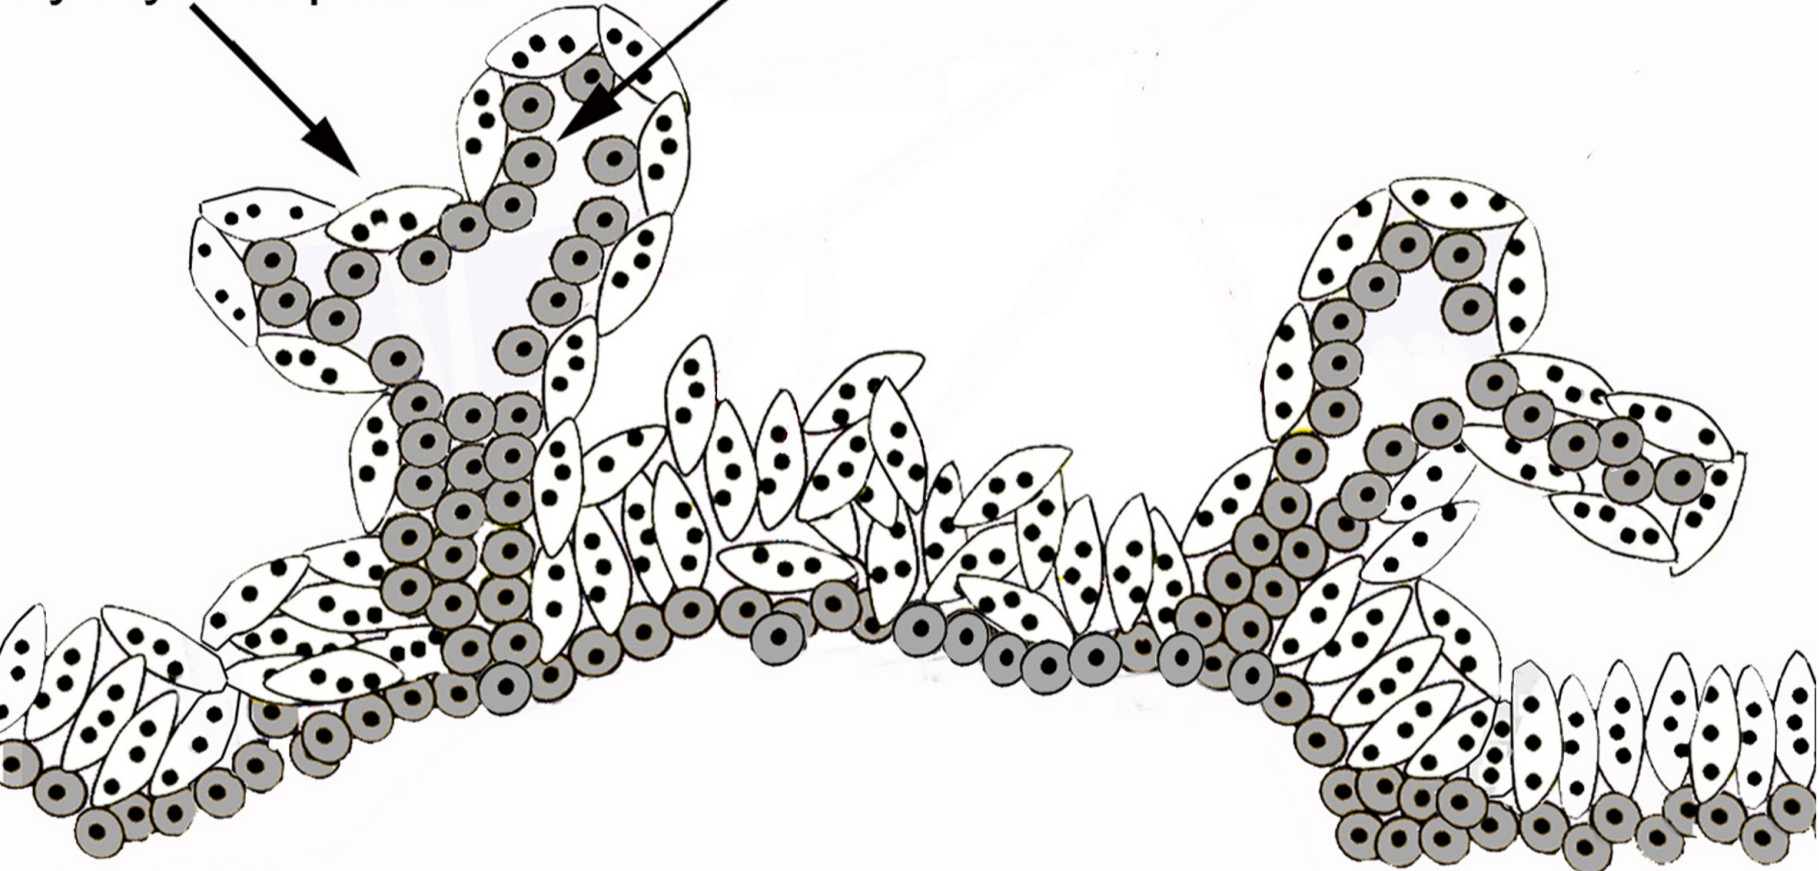**D**

Extravillous cytotrophoblast

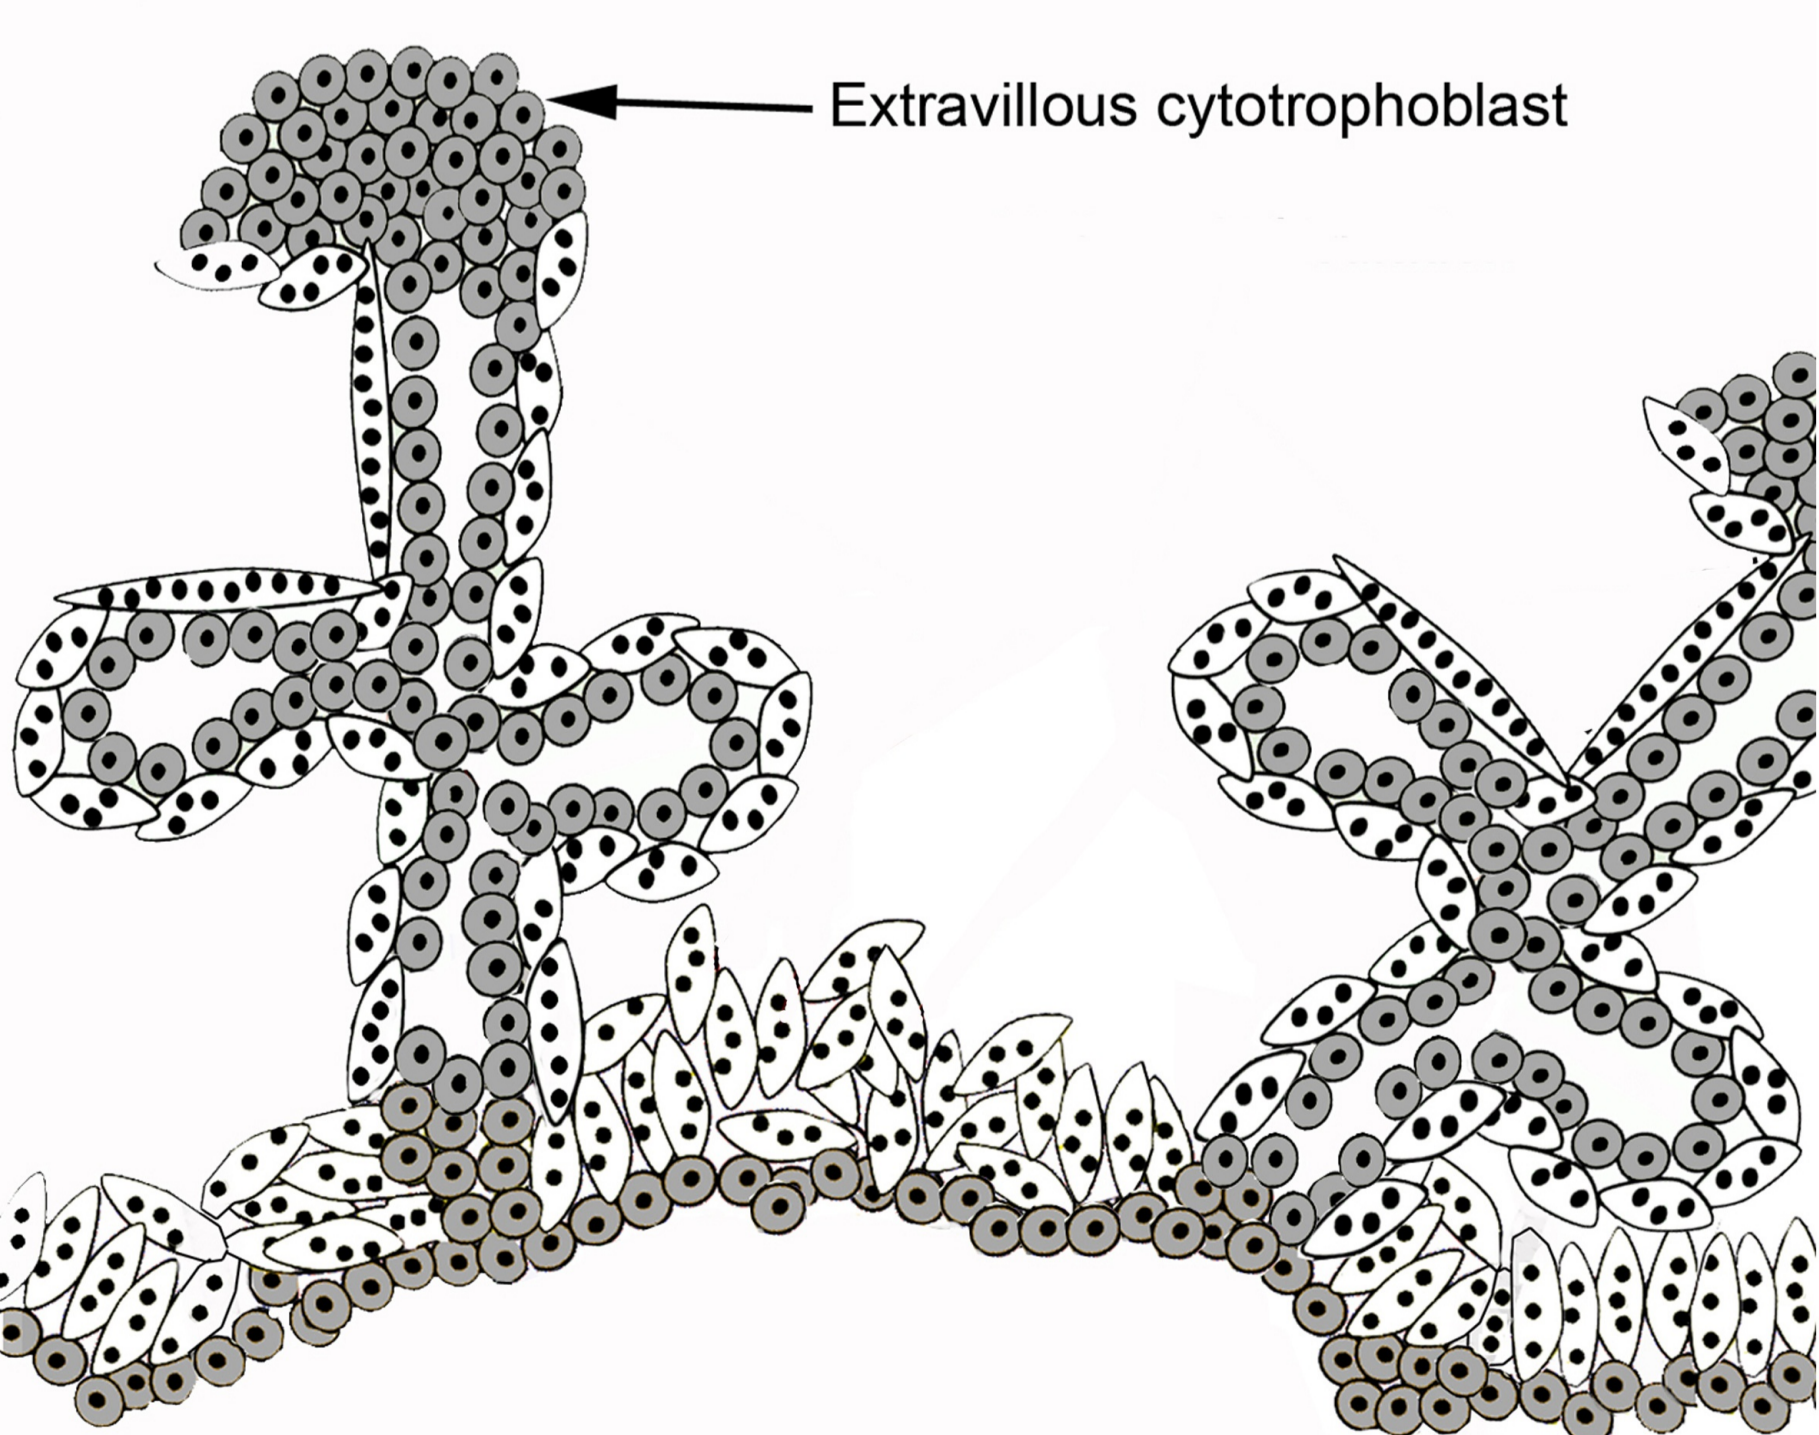

Supplement: MOESM2 [file 9566472]
